# Supplementary material
Source: publisher figshare collection journal article supplement (https://frontiersin.figshare.com/ndownloader/files/21196434)
Supplement: Supplementary file [file 21196434]

## Cullin-5 adaptor SPSB1 controls NF- $\kappa$ B activation downstream of multiple signalling pathways

Georgana and Maluquer de Motes

### Supplementary Material

#### Figure S1

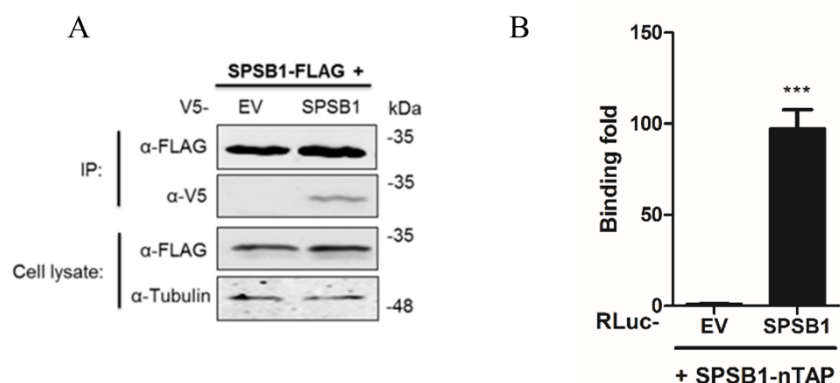

**Figure S1. SPSB1 self-associates.** (A) HEK293T cells were co-transfected with V5-tagged SPSB1, or an empty vector (EV) and FLAG-tagged SPSB1. The cells were lysed in IP buffer and subjected to FLAG IP. The IP and cell lysates were loaded onto an SDS-PAGE gel and immunoblotted against V5, FLAG and  $\alpha$ -tubulin. (B) HEK293T cells were co-transfected in triplicates with RLuc-tagged SPSB1, or RLuc-only (EV) as a control and SPSB1-nTAP. Cells were lysed in IP buffer supplemented with protease inhibitors and lysates subjected to AP using streptavidin beads. The beads were eluted with biotin and the luciferase activity was measured both in lysates and eluates. The binding fold was calculated as an eluate/lysate ratio and this was normalised to the EV control. The experiments have been repeated three times independently. Means and standard deviations are shown and statistical significance was determined by using an unpaired Student's *t*-test (\*\*\*)  $p \leq 0.001$ .

**Figure S2**

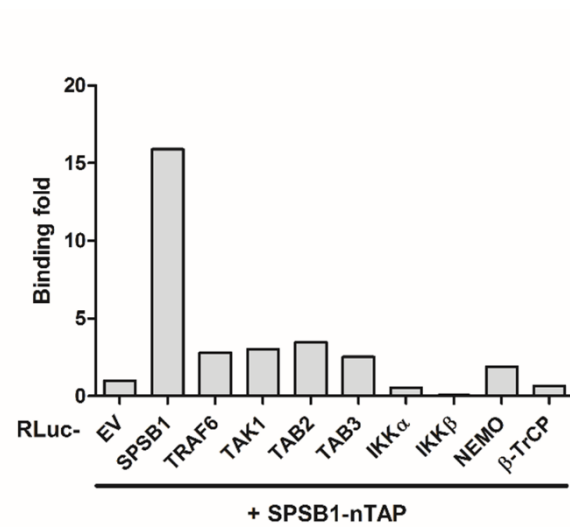

**Figure S2. SPSB1 does not associate with any of the NF-κB components tested in LUMIER screens.** HEK293T cells were co-transfected with SPSB1-nTAP and different components of the NF-κB pathway fused to RLuc, or an RLuc-only (EV) control. SPSB1 self-association was used as a positive control. Cells were treated as in Fig. S1 and the binding fold was calculated as an eluate/lysate ratio and this was normalised to the EV control. Data are representative of 2 experiments showing similar results.

**Figure S3**

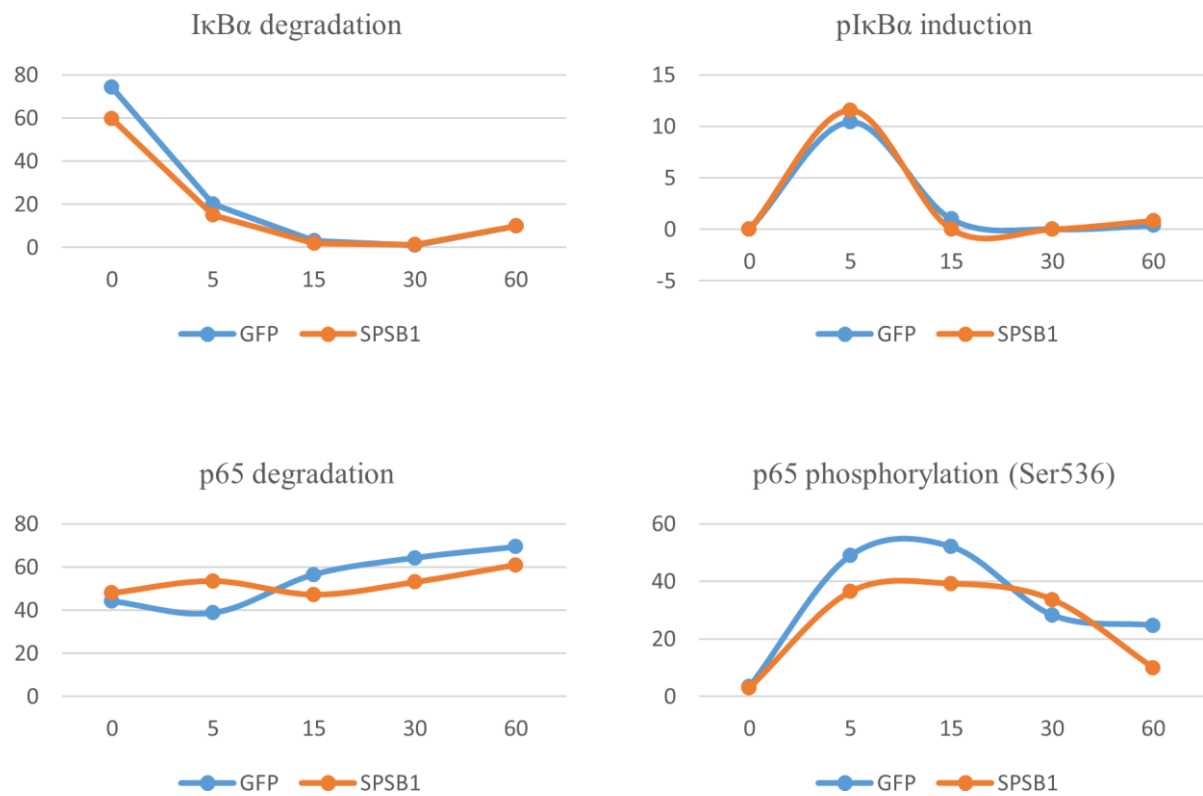

**Figure S3. Densitometric analysis of the phosphorylation and degradation of I $\kappa$ B $\alpha$  and p65 in GFP- or SPSB1-expressing A549 cells.** Immunoblotting results from Fig. 6 were quantitated (arbitrary units) and plotted over time.

**Table S1.** RNAi sequences employed for the specific knock-down of CRL5 substrate adaptor molecules.

| Gene Symbol | Accession number | Duplex Number | Sequence             |
|-------------|------------------|---------------|----------------------|
| FBXW11      | NM_033645        | D-003490-02   | GCACAUUGGUGGAACAUUC  |
| FBXW11      | NM_033645        | D-003490-03   | GUUAGUGGAUCAUCAGAU   |
| FBXW11      | NM_033645        | D-003490-04   | GAGCAAGGCUUAGAUCACA  |
| FBXW11      | NM_033645        | D-003490-17   | AGAAGUAAAUCGACCGUCA  |
| ASB1        | NM_001040445     | D-017197-01   | GAAGAAAAGUGGACCCUGA  |
| ASB1        | NM_001040445     | D-017197-02   | GAGCCAACCUGAAUCUAGU  |
| ASB1        | NM_001040445     | D-017197-03   | GCAAACACCGGCUUCAUCU  |
| ASB1        | NM_001040445     | D-017197-04   | GCGCGAACCCUGACUUCAA  |
| ASB2        | NM_016150        | D-009575-01   | GAAAGGCCAUUGGGAAAUA  |
| ASB2        | NM_016150        | D-009575-02   | GCACGAGGCCGCAUACUAU  |
| ASB2        | NM_016150        | D-009575-03   | GAACAUCGACGCCUAUAUC  |
| ASB2        | NM_016150        | D-009575-04   | UUAGAUACCUGAAAUAACGA |
| ASB3        | NM_016115        | D-017457-01   | GGACAAAGCUACACCCUUG  |
| ASB3        | NM_016115        | D-017457-02   | GAAAGCUUGAGCAUACUUA  |
| ASB3        | NM_016115        | D-017457-03   | GAACGUCUACGGUCUGACA  |
| ASB3        | NM_016115        | D-017457-04   | CUUUGGAGUUUACUAAUUG  |
| ASB4        | NM_016116        | D-013339-01   | CUACAAAGCCGAAGUCAAU  |
| ASB4        | NM_016116        | D-013339-02   | CCAAGUUAGUUAAGAGAAA  |
| ASB4        | NM_016116        | D-013339-03   | CAAGGUUACUGGUUGCCUA  |
| ASB4        | NM_016116        | D-013339-04   | CCACAAUGCUACAAUCAAC  |
| ASB5        | NM_080874        | D-017458-02   | GGAUAUUGCUUCAACAUGA  |
| ASB5        | NM_080874        | D-017458-03   | GCCGUUUGCUCAACAAUUA  |
| ASB5        | NM_080874        | D-017458-04   | CAAGGAAGCGGCAAGGAUA  |
| ASB5        | NM_080874        | D-017458-17   | UGUAAUGGAUAACGUGCAU  |
| ASB6        | NM_017873        | D-013355-01   | GAACAUUCGUCUCUACUG   |
| ASB6        | NM_017873        | D-013355-02   | GGAGGAUCAUCUUCGAGUA  |
| ASB6        | NM_017873        | D-013355-03   | GCAACGCCCUGCUCAAGAU  |
| ASB6        | NM_017873        | D-013355-04   | CUGAAGAGCUUUAACUGC   |
| ASB7        | NM_024708        | D-012930-01   | GUGCACGGAUGUUAUAUAA  |
| ASB7        | NM_024708        | D-012930-02   | GGAGCGACAUCAUUAUUGC  |
| ASB7        | NM_024708        | D-012930-03   | GCGAUACGCCGUGAUCAAA  |
| ASB7        | NM_024708        | D-012930-04   | CGAACACACGGAACUAUGA  |
| ASB8        | NM_024095        | D-014301-01   | GGGCAGCCUUUAAGAACAA  |
| ASB8        | NM_024095        | D-014301-02   | GCGCUUAAUCCGAACAAUU  |
| ASB8        | NM_024095        | D-014301-03   | GCGCAGAGGUCAGAGUCAU  |
| ASB8        | NM_024095        | D-014301-04   | CUGGAUGGGUAUAACCGAA  |
| ASB9        | NM_024087        | D-014295-01   | GCAUCAGGCUUCUUUCAA   |
| ASB9        | NM_024087        | D-014295-02   | GCAUGGAGCUCAGGUGAAU  |
| ASB9        | NM_024087        | D-014295-03   | GCACGGAGCCAGCGUUCAA  |
| ASB9        | NM_024087        | D-014295-04   | GAUGGGCGAUGCUGUGUCU  |
| ASB10       | NM_080871        | D-007725-01   | CAACAUCGCUGACCAGGAU  |

|        |              |             |                      |
|--------|--------------|-------------|----------------------|
| ASB10  | NM_080871    | D-007725-02 | CAACAUCCGUGCUCUGAGA  |
| ASB10  | NM_080871    | D-007725-04 | GAGUUGGUCUCCAGAAGAG  |
| ASB10  | NM_080871    | D-007725-17 | GGUCUCUGACAUACGAAGA  |
| ASB11  | NM_001012428 | D-013267-01 | GAGCUAACCUGAAGCGUAG  |
| ASB11  | NM_001012428 | D-013267-03 | GCUCGGAACUCCCCUAUUAU |
| ASB11  | NM_001012428 | D-013267-04 | CAGAGCCACUCGAACGAUU  |
| ASB11  | NM_001012428 | D-013267-18 | CCGGAAGUGUCUCGGUCGA  |
| ASB12  | NM_130388    | D-013180-01 | GAAAUUCUGCCUCCAUCAUA |
| ASB12  | NM_130388    | D-013180-02 | GAAGCAGGCUCUCAAUCAA  |
| ASB12  | NM_130388    | D-013180-03 | GAGUAUAUCCAGCUGUUA   |
| ASB12  | NM_130388    | D-013180-04 | CGUCAAAAGCUAAACUACCA |
| ASB13  | NM_024701    | D-012929-01 | GGAAGAAGCCGUCUGACUA  |
| ASB13  | NM_024701    | D-012929-02 | CCAAGUGCUUCGAGUACUA  |
| ASB13  | NM_024701    | D-012929-03 | GAGAAGAUUGCCAAGUUA   |
| ASB13  | NM_024701    | D-012929-04 | CGAGAUGCUUAUCGAGUUU  |
| ASB14  | NM_130387    | D-013205-01 | GUUGAAGGCUGGACAUCUA  |
| ASB14  | NM_130387    | D-013205-03 | GAUACUAAGUUCUGUGAAG  |
| ASB14  | NM_130387    | D-013205-04 | CUGCAGAGUUAACCCUUA   |
| ASB14  | NM_130387    | D-013205-17 | CCGCCUAAAGAUCCGGAAA  |
| ASB15  | NM_080928    | D-031158-01 | CGACUCUGAUCAAACAUA   |
| ASB15  | NM_080928    | D-031158-02 | GAUAUUCAGCUAAGUAUUC  |
| ASB15  | NM_080928    | D-031158-04 | GUCAAGCGAUGGUCAGCAA  |
| ASB15  | NM_080928    | D-031158-17 | AGAGGAAGACUGCGCUGUA  |
| ASB16  | NM_080863    | D-013061-01 | CCGAGCUGCUGCUGCGUUA  |
| ASB16  | NM_080863    | D-013061-02 | AGACCCAGCUGUCCACCAA  |
| ASB16  | NM_080863    | D-013061-03 | AGACUGUGCUCGACACCUG  |
| ASB16  | NM_080863    | D-013061-04 | UCGCCGCACUGCUGGACUA  |
| ASB17  | NM_080868    | D-015284-01 | GAACUUUCACACCAGUAUA  |
| ASB17  | NM_080868    | D-015284-02 | GGUAUAUCACUGUUACGAAC |
| ASB17  | NM_080868    | D-015284-03 | AAUGGUUGAUCGUGAAUUG  |
| ASB17  | NM_080868    | D-015284-04 | UCACAGAUUACAUGCAUU   |
| ASB18  | NM_212556    | D-032545-02 | CAAUAAGGAUGAGAUGGAA  |
| ASB18  | NM_212556    | D-032545-03 | GAAAUUCUCCAGCCACGUUU |
| ASB18  | NM_212556    | D-032545-04 | GAAGACCUGUGCAUCUGUC  |
| ASB18  | NM_212556    | D-032545-17 | CGGAUUACCUUCCCGACUA  |
| CISH   | NM_145071    | D-017381-01 | GACAACACCUGCAGAAGAU  |
| CISH   | NM_145071    | D-017381-02 | GAAGGCACGUUCUAGUAC   |
| CISH   | NM_145071    | D-017381-03 | CCACUGCUGUACACCUAAA  |
| CISH   | NM_145071    | D-017381-04 | CCGACUACCUCGACAGUA   |
| RAB40A | NM_080879    | D-008924-01 | GCAAACCGCUGGUCUUUCG  |
| RAB40A | NM_080879    | D-008924-02 | GGUAUGGAUCGAUGGAUUA  |
| RAB40A | NM_080879    | D-008924-03 | CGACCAGGCCUAUGACUUC  |
| RAB40A | NM_080879    | D-008924-05 | GGGUAUGGAUCGAUGGAUU  |
| RAB40B | NM_006822    | D-008353-01 | CGGCAUUGAUCGAUGGAUU  |
| RAB40B | NM_006822    | D-008353-02 | CGGUGCACCUGGUGGACAA  |
| RAB40B | NM_006822    | D-008353-03 | CGGCGGGCAUCGACUACAA  |

|        |           |             |                      |
|--------|-----------|-------------|----------------------|
| RAB40B | NM_006822 | D-008353-04 | GGUCUAUGACAUUGCGAAC  |
| RAB40C | NM_021168 | D-010368-01 | GCAGUCCGGUGAAGAGCUA  |
| RAB40C | NM_021168 | D-010368-02 | CAGAACUGCUCGCGGAGUA  |
| RAB40C | NM_021168 | D-010368-03 | GUAACGGGAUCGACUACAA  |
| RAB40C | NM_021168 | D-010368-04 | GCGCGUACGCAGAGAAGAA  |
| SOCS1  | NM_003745 | D-011511-07 | GCAUCCGCGUGCACUUUCA  |
| SOCS1  | NM_003745 | D-011511-08 | GGUGGCAGCCGACAAUGCA  |
| SOCS1  | NM_003745 | D-011511-09 | GGACGCCUGCGGAUUCUAC  |
| SOCS1  | NM_003745 | D-011511-23 | UGUUAUUACUUGCCUGGAA  |
| SOCS2  | NM_003877 | D-017604-01 | GAAGGAACUUUCUUGAUUA  |
| SOCS2  | NM_003877 | D-017604-02 | GAAGUAUGACUGUUAUGA   |
| SOCS2  | NM_003877 | D-017604-03 | GCAUUCAGACUACCUACUA  |
| SOCS2  | NM_003877 | D-017604-04 | UCAUAUGUGUCAAUCCAA   |
| SOCS3  | NM_003955 | D-004299-06 | CCUAUUACAUCUACUCCGG  |
| SOCS3  | NM_003955 | D-004299-08 | UCAAGACCUUCAGCUCCAA  |
| SOCS3  | NM_003955 | D-004299-21 | CAGCAUCUCUGUCGGAAGA  |
| SOCS3  | NM_003955 | D-004299-22 | GCGAUGGAAUUAACCUGGAA |
| SOCS4  | NM_080867 | D-009037-02 | GCACAGCUGUUCAUCCAUA  |
| SOCS4  | NM_080867 | D-009037-04 | GAACUCAUGUUAGAUAAGU  |
| SOCS4  | NM_080867 | D-009037-05 | ACACGCAGAUUGAUUAUGU  |
| SOCS4  | NM_080867 | D-009037-06 | GCGCCUGUAUGUUCUUUGA  |
| SOCS5  | NM_014011 | D-017374-01 | CAACAAAGCAGUCCCUUAA  |
| SOCS5  | NM_014011 | D-017374-02 | AGACAGAGGUUGCAGGAUA  |
| SOCS5  | NM_014011 | D-017374-03 | GGAGGAAGCCGUAGUGAAA  |
| SOCS5  | NM_014011 | D-017374-04 | GAGAGAAGGCGGCUUAGUA  |
| SOCS6  | NM_004232 | D-017375-01 | GAGGAGACCUGCAUCAAGA  |
| SOCS6  | NM_004232 | D-017375-03 | GAACAUGUGCCUGUCGUUA  |
| SOCS6  | NM_004232 | D-017375-04 | GUCCAUAAGUUGAUCUAAUU |
| SOCS6  | NM_004232 | D-017375-17 | GAUAUGGCCAGCUGCGAUA  |
| SOCS7  | NM_014598 | D-027197-01 | GGAGAAGUGUGGUUGGUAAU |
| SOCS7  | NM_014598 | D-027197-02 | AAACCCAAGUUGACAAGAA  |
| SOCS7  | NM_014598 | D-027197-03 | UCCGAAAGUUCUACUACUA  |
| SOCS7  | NM_014598 | D-027197-04 | AAGCGCAGCUCAUUUCCAA  |
| SPSB1  | NM_025106 | D-015262-01 | GGACGACAAGCUCAUCUUU  |
| SPSB1  | NM_025106 | D-015262-02 | GAACAACAACGACCGAUCG  |
| SPSB1  | NM_025106 | D-015262-03 | ACUCUGAGCUUCAUUGUGG  |
| SPSB1  | NM_025106 | D-015262-04 | ACACAACCCUCGUGGGGAA  |
| SPSB2  | NM_032641 | D-014947-02 | GAACUCUGGGCUACGCUAU  |
| SPSB2  | NM_032641 | D-014947-03 | GACCCUCUAUCCGGCAGUA  |
| SPSB2  | NM_032641 | D-014947-04 | CUACCUGGGCGAAAGGAGA  |
| SPSB2  | NM_032641 | D-014947-17 | UGACAGUCUGCUACGCAAA  |
| SPSB3  | NM_080861 | D-017713-01 | GGUCUGGGAUGACUUAUUU  |
| SPSB3  | NM_080861 | D-017713-02 | GAUGACCUCUCCCGUCUAC  |
| SPSB3  | NM_080861 | D-017713-03 | ACAAAUACCGCCACACGUU  |
| SPSB3  | NM_080861 | D-017713-04 | GCGGAGAGGAAGACGAGUA  |
| SPSB4  | NM_080862 | D-015283-01 | GCAAGAAGCUGUACCCGGU  |

|       |           |             |                     |
|-------|-----------|-------------|---------------------|
| SPSB4 | NM_080862 | D-015283-02 | ACACUCAGCUUCAUCGUGG |
| SPSB4 | NM_080862 | D-015283-03 | AAAACUAUCUGCAGUACCA |
| SPSB4 | NM_080862 | D-015283-04 | GCACCCACGCUGUAGUUGG |
| WSB1  | NM_134265 | D-013015-01 | UAUGGGACCUGAAAGAUGA |
| WSB1  | NM_134265 | D-013015-02 | GGAAACAUGAUGAAAGUAU |
| WSB1  | NM_134265 | D-013015-03 | GAAGUGGUCAGAGAUUUA  |
| WSB1  | NM_134265 | D-013015-04 | GAAAACUCCUCCUUAACUU |
| WSB2  | NM_018639 | D-017223-01 | CAUGAGGUCCUACACGUUA |
| WSB2  | NM_018639 | D-017223-02 | CGAUGUCUCUUGCCUGGUU |
| WSB2  | NM_018639 | D-017223-03 | CAAGAUGUCGUGAGAGAUC |
| WSB2  | NM_018639 | D-017223-04 | CCGGAAAGCCCUUCGAAGU |
